# Supplementary material
Source: Springer Nature journal article supplement (https://www.springermedizin.de/resource/supplementary/12879_2007_607_MOESM3_ESM.pdf/9449300)

proportion still in stage 1

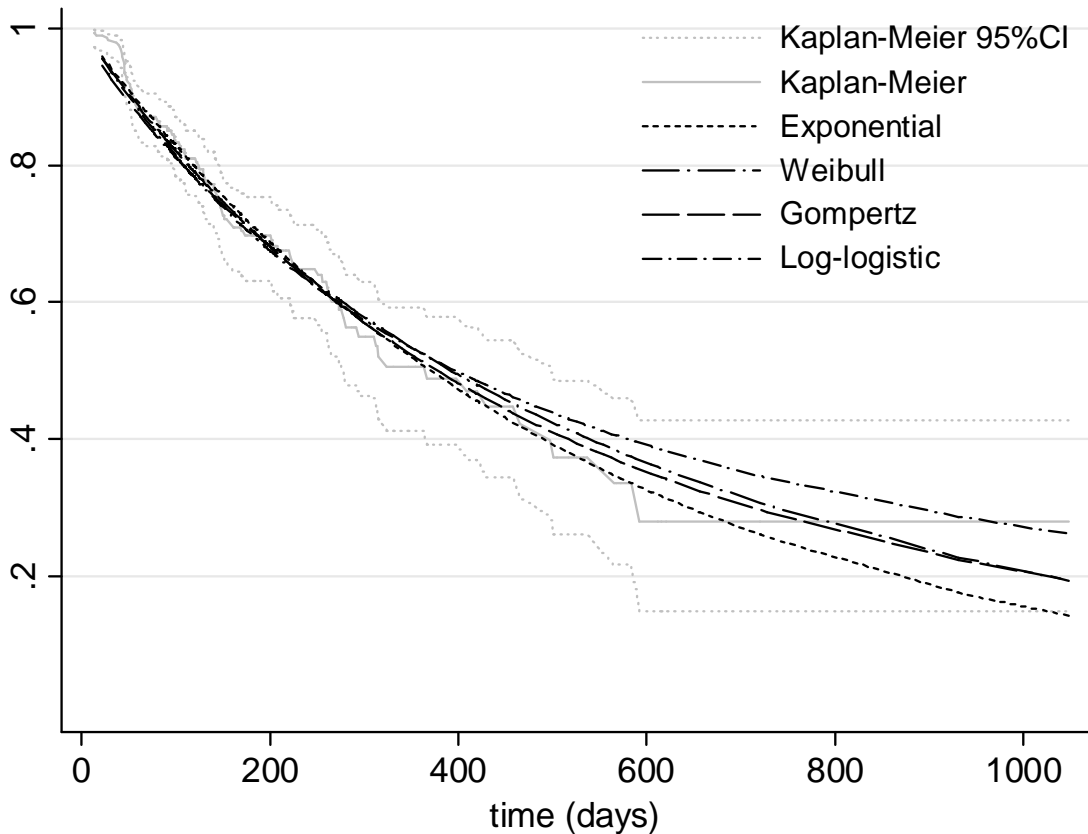

Supplement: MOESM3 [file 9449300]
